# Supplementary material for: The Teddy tool v1.1: temporal disaggregation of daily climate model data for climate impact analysis
Source: Copernicus journal article supplement (doi:10.5194/gmd-16-5383-2023), 2023-09-21
Supplement: Supplementary file 1 [file gmd-16-5383-2023-supplement.pdf]

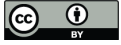

*Supplement of*

## **The Teddy tool v1.1: temporal disaggregation of daily climate model data for climate impact analysis**

**Florian Zabel and Benjamin Poschlod**

*Correspondence to:* Florian Zabel (f.zabel@lmu.de)

The copyright of individual parts of the supplement might differ from the article licence.

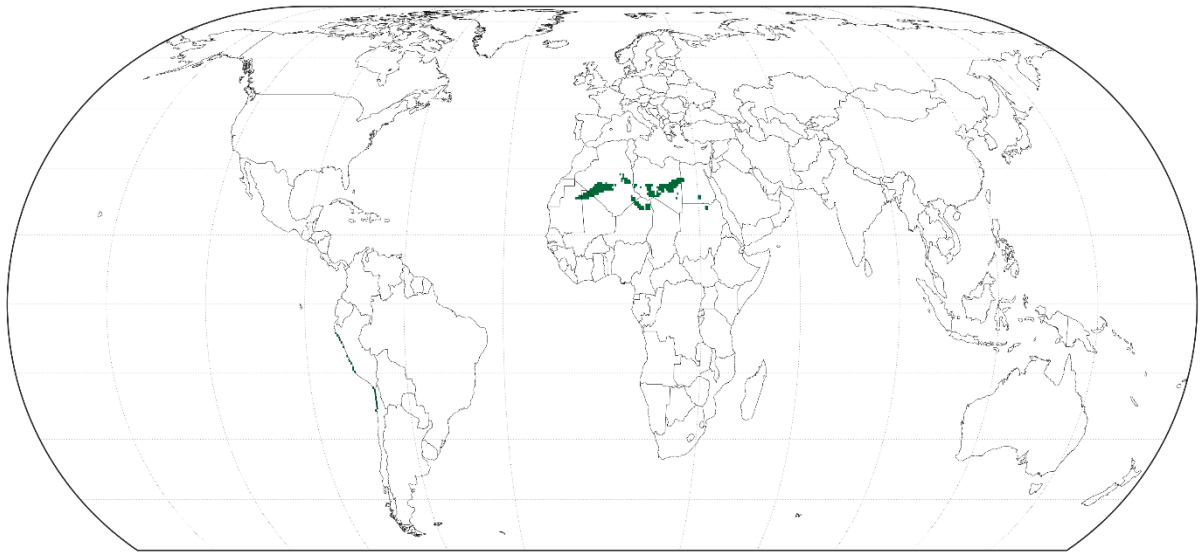

Areas without historical precipitation in WFDE5 (1980-2019)

Figure S1: Areas without historical precipitation between 1980 and 2019 in the WFDE5 dataset.

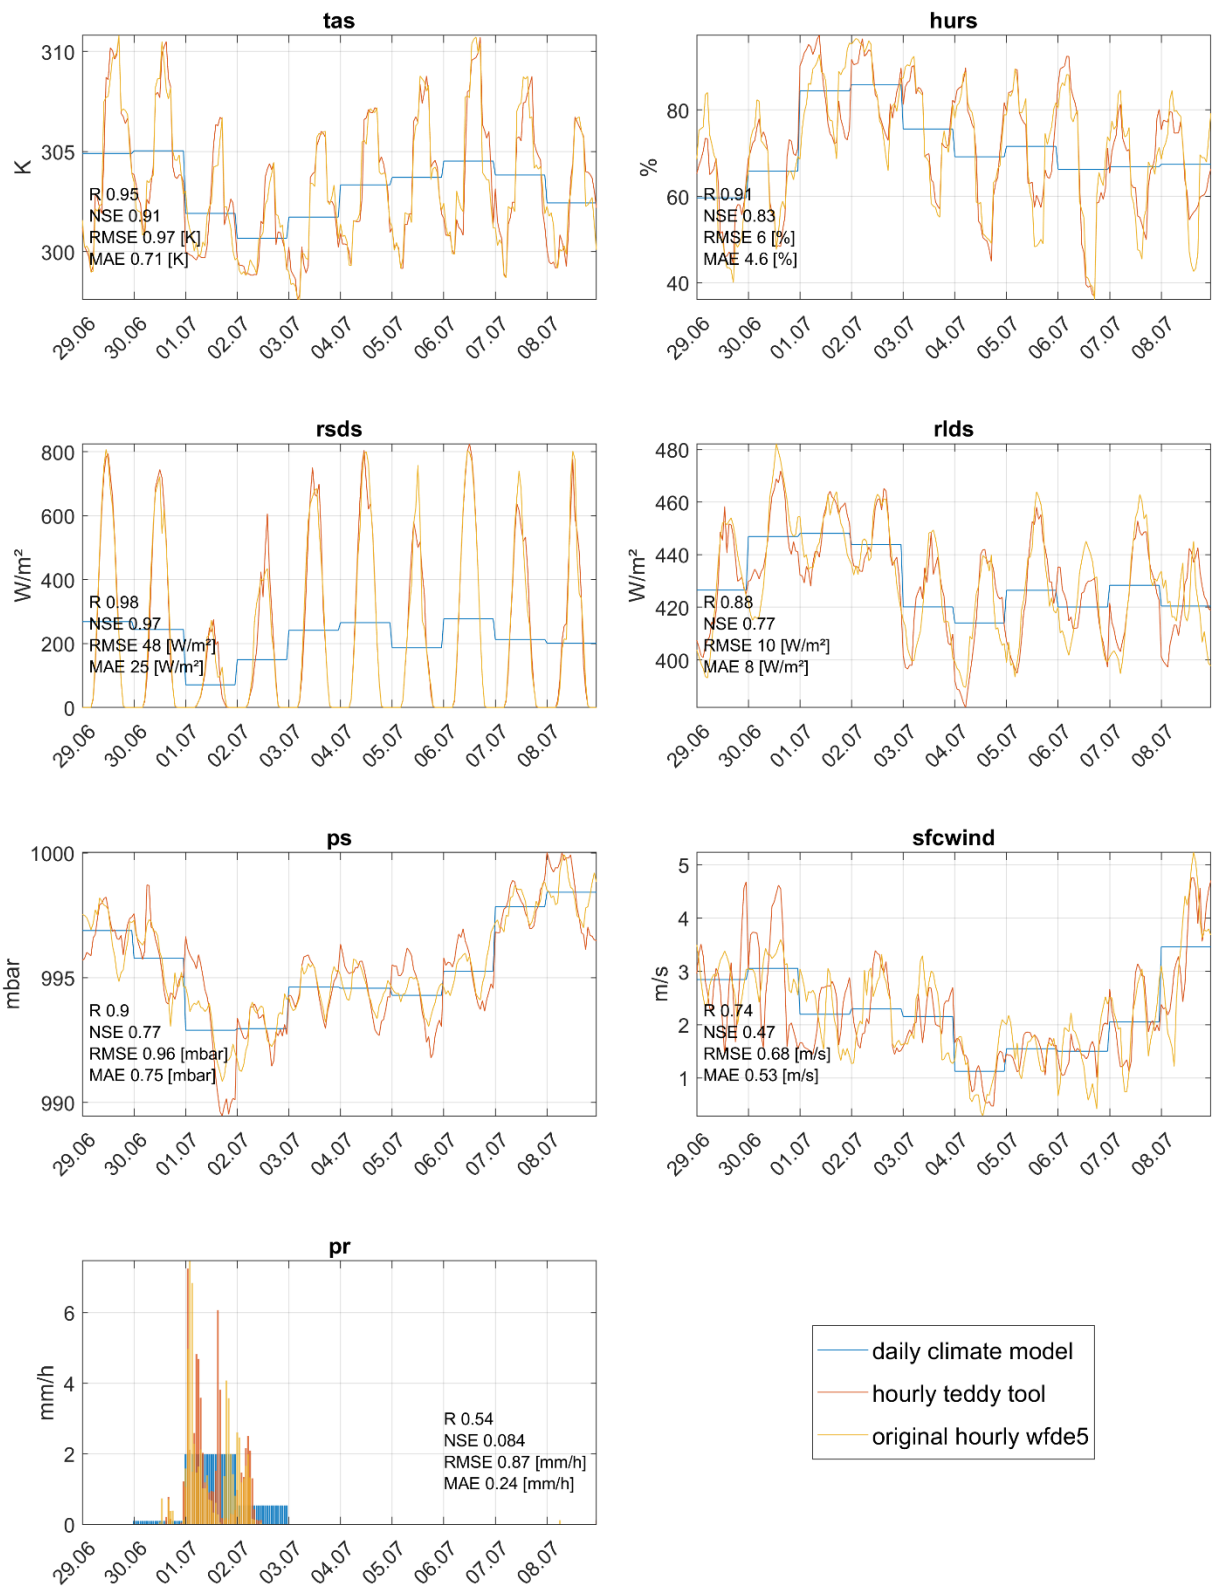

Figure S2: Same as Fig. 3, but for sample location 22 in China.

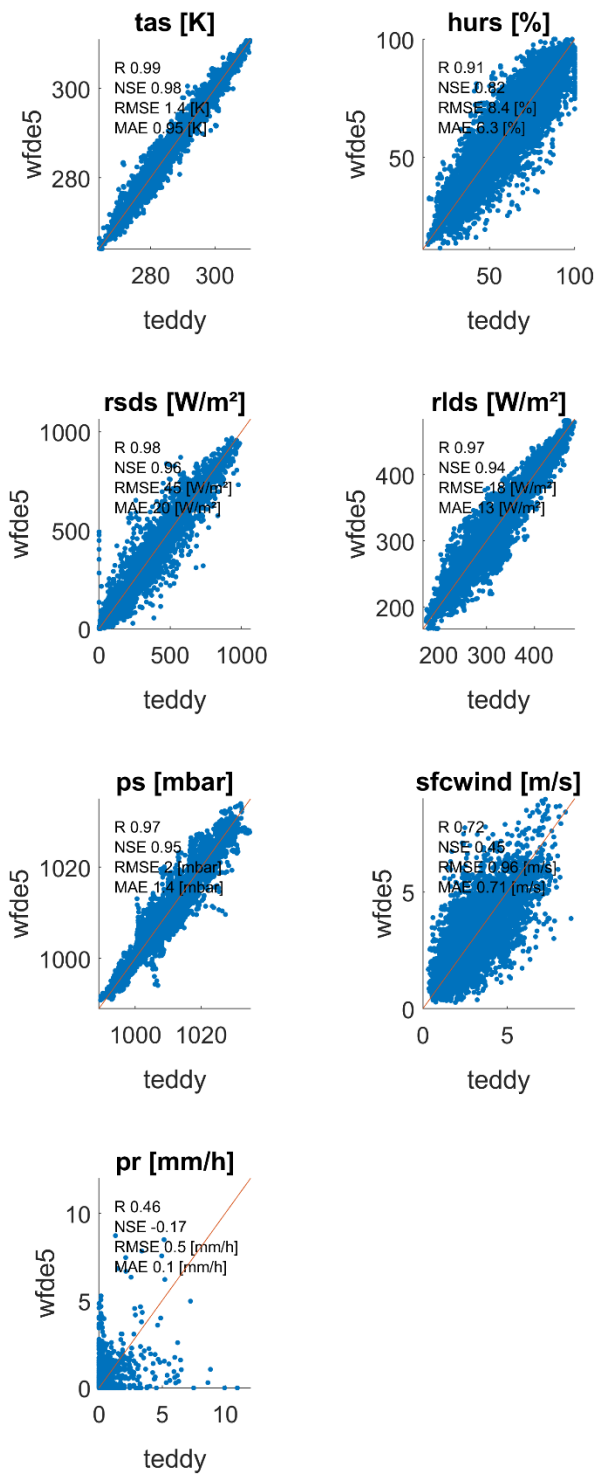

Figure S3: Same as Fig. 4, but for sample location 22 in China.

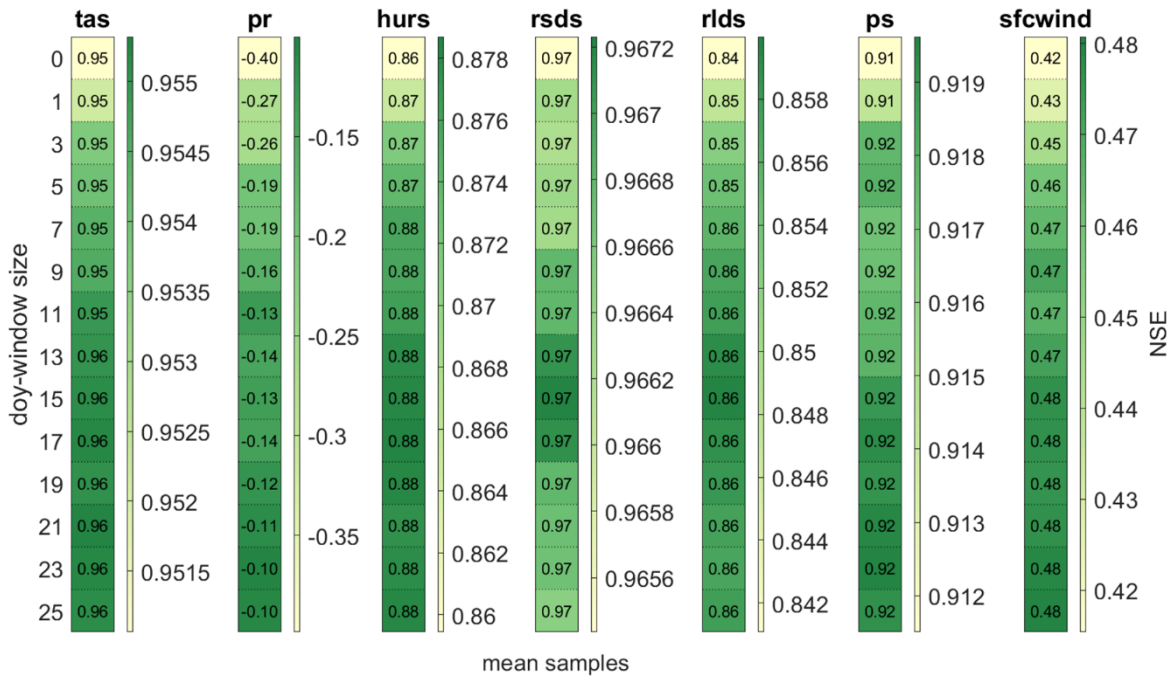

Figure S4: Same as Fig. 5, but showing the Nash-Sutcliffe model efficiency coefficient (NSE).

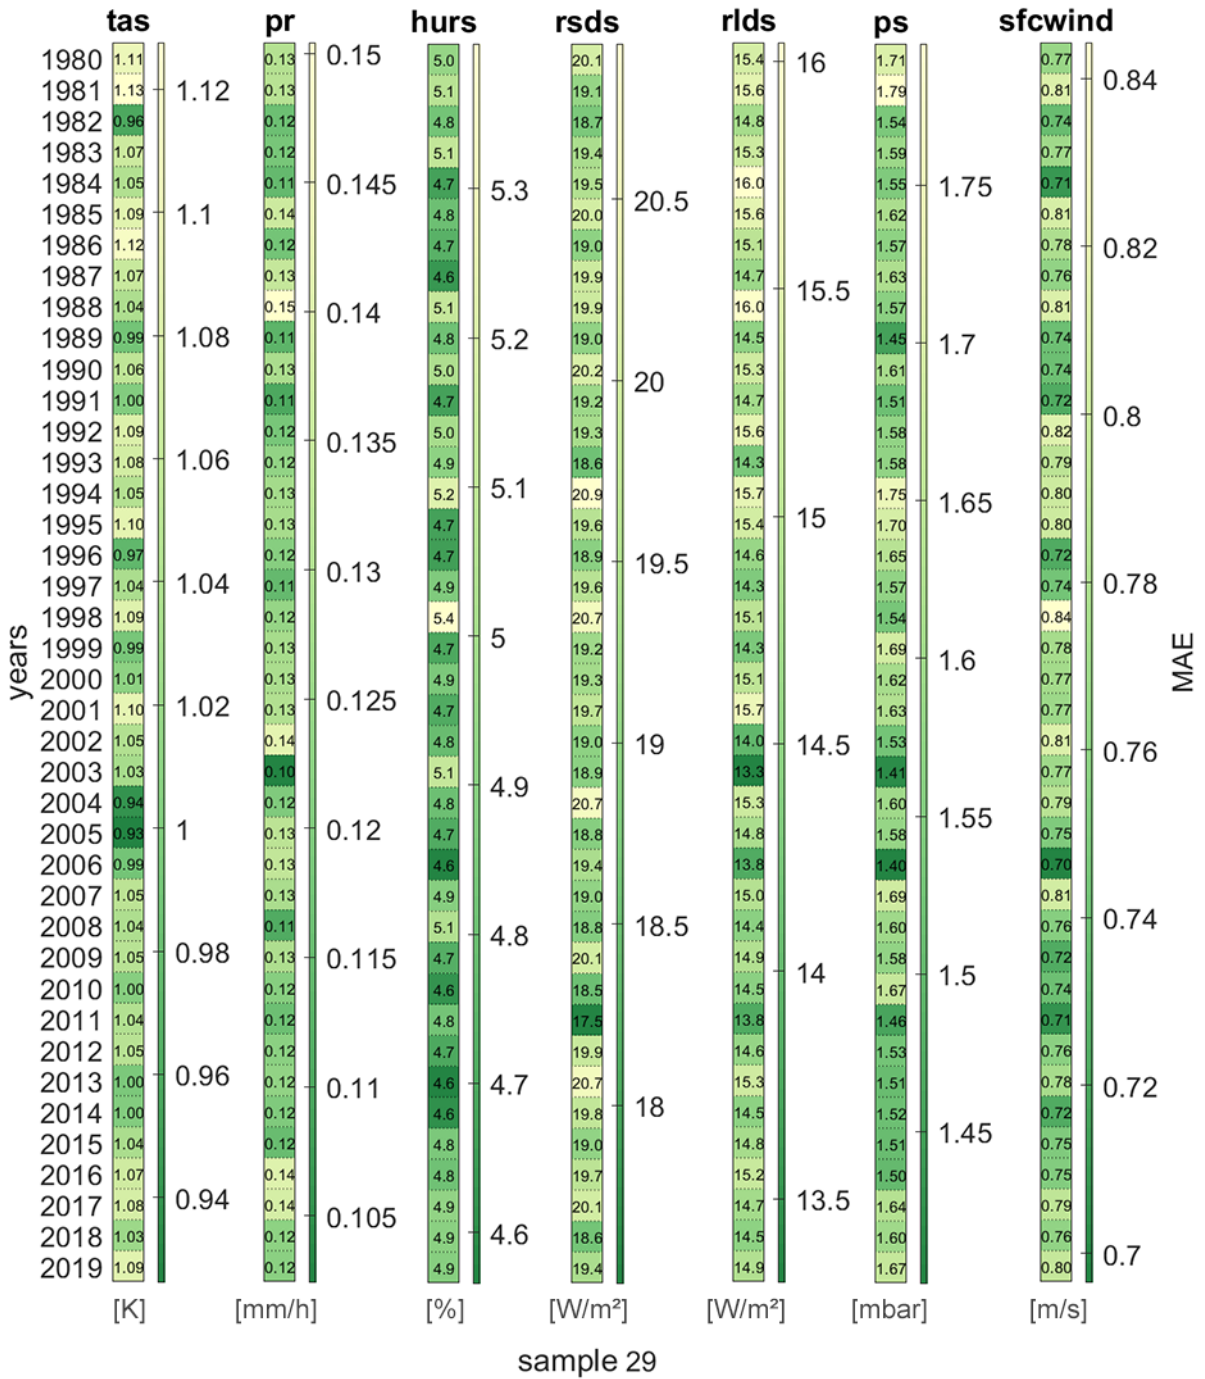

Figure S5: Same as Fig. 9, but showing the mean absolute error (MAE).

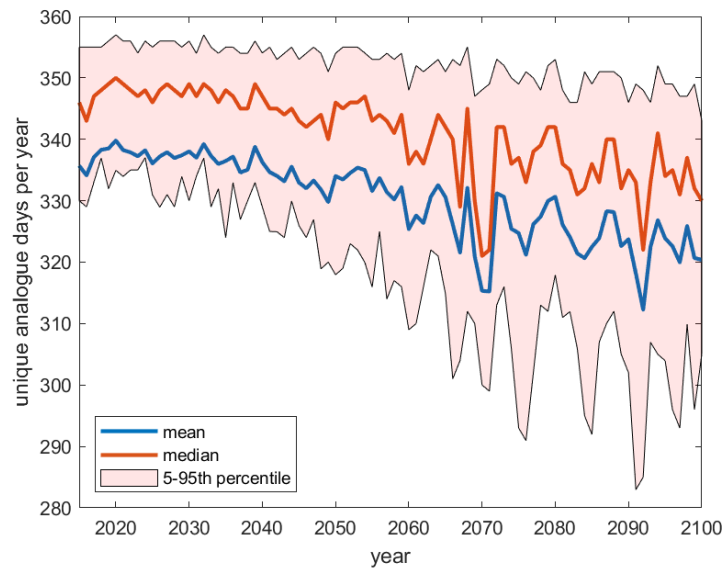

Figure S6: Number of unique analogue climate days per year for the GFDL-ESM4 climate model under SSP 3-7.0 for the years 2015-2100 and a selected moving window size of 11 days, showing the mean (blue) and median (orange), as well as the range between the 5th and 95th percentile for a number of 592 samples in the USA.
